# The impact of cross-reactive immunity on the emergence of SARS-CoV-2 variants

1 **R.N. Thompson<sup>1,2\*</sup>, E. Southall<sup>1,2</sup>, Y. Daon<sup>3,4</sup>, F.A. Lovell-Read<sup>5</sup>, S. Iwami<sup>6</sup>, C.P. Thompson<sup>7†</sup>,**  
2 **U. Obolski<sup>3,4†</sup>**

3 <sup>1</sup>Mathematics Institute, University of Warwick, Coventry, UK

4 <sup>2</sup>Zeeman Institute for Systems Biology and Infectious Disease Epidemiology Research, University of  
5 Warwick, Coventry, UK

6 <sup>3</sup>School of Public Health, Faculty of Medicine, Tel Aviv University, Tel Aviv, Israel

7 <sup>4</sup>Porter School of the Environment and Earth Sciences, Faculty of Exact Sciences, Tel Aviv University,  
8 Tel Aviv, Israel

9 <sup>5</sup>Mathematical Institute, University of Oxford, Oxford, UK

10 <sup>6</sup>Department of Biology, Nagoya University, Nagoya, Japan

11 <sup>7</sup>Division of Biomedical Sciences, Warwick Medical School, University of Warwick, Coventry, UK

12 **\* Correspondence:**

13 Corresponding Author

14 [robin.n.thompson@warwick.ac.uk](mailto:robin.n.thompson@warwick.ac.uk)

15 <sup>†</sup>These authors contributed equally

16 **Keywords: Cross-reactive immunity, Mathematical modelling, Infectious disease epidemiology,**  
17 **SARS-CoV-2, COVID-19, Variants, Emergence**

## 18 **Abstract**

19 A key feature of the COVID-19 pandemic has been the emergence of SARS-CoV-2 variants with  
20 different transmission characteristics. However, when a novel variant arrives in a host population, it  
21 will not necessarily lead to many cases. Instead, it may fade out, due to stochastic effects and the  
22 level of immunity in the population. Immunity against novel SARS-CoV-2 variants may be  
23 influenced by prior exposures to related viruses, such as other SARS-CoV-2 variants and seasonal  
24 coronaviruses, and the level of cross-reactive immunity conferred by those exposures. Here, we  
25 investigate the impact of cross-reactive immunity on the emergence of SARS-CoV-2 variants in a  
26 simplified scenario in which a novel SARS-CoV-2 variant is introduced after an antigenically related  
27 virus has spread in the population. We use mathematical modelling to explore the risk that the novel  
28 variant invades the population and causes a large number of cases, as opposed to fading out. If cross-  
29 reactive immunity is complete (i.e. someone infected by the previously circulating virus is no longer  
30 susceptible to the novel variant), the novel variant must be more transmissible than the previous virus  
31 to invade the population. However, in a more realistic scenario in which cross-reactive immunity is  
32 partial, we show that it is possible for novel variants to invade, even if they are less transmissible  
33 than previously circulating viruses. This is because partial cross-reactive immunity effectively  
34 increases the pool of susceptible hosts that are available to the novel variant compared to complete  
35 cross-reactive immunity. Furthermore, if previous infection with the antigenically related virus  
36 assists the establishment of infection with the novel variant, as has been proposed following some  
37 experimental studies, then even variants with very limited transmissibility are able to invade the host  
38 population. Our results highlight that fast assessment of the level of cross-reactive immunity

39 conferred by related viruses on novel SARS-CoV-2 variants is an essential component of novel  
40 variant risk assessments.

## 41 **1 Introduction**

42 When a new SARS-CoV-2 variant first arrives in a host population, a key question for policy makers  
43 is whether or not it will become widespread. For this to occur, two steps are required: introduction  
44 and invasion. First, the variant must arrive in the host population, either through de novo mutation or  
45 by importation from elsewhere (introduction). Second, the variant must then spread from person to  
46 person and cause a large number of cases, as opposed to simply fading out (invasion). Following  
47 introduction, a range of factors affect the risk that a novel variant will invade, including its inherent  
48 transmissibility and the connectivity of the location in which it is introduced [1,2]. An additional  
49 crucial factor in this process is the background level of immunity to the new variant in the host  
50 population. For example, a feature of the Omicron (B.1.1.529) variant that allowed it to become  
51 widespread is its ability to evade immunity from past infection or vaccination, at least partially,  
52 meaning that the background immunity level was low [3–6].

53 Mathematical modelling has often been used to explore the impact of cross-reactive immunity  
54 between pathogen strains on the dynamics of infectious disease outbreaks [7–12]. During the  
55 COVID-19 pandemic, models have provided real-time insights into the risk from novel variants. For  
56 example, Bhatia *et al.* [13] extended existing methods for estimating pathogen transmissibility  
57 [14,15] to enable the transmissibility of novel variants to be assessed, including estimating the  
58 infectiousness of the Alpha (B.1.1.7), Beta (B.1.351) and Gamma (P.1) variants relative to the wild  
59 type virus (the SARS-CoV-2 virus that first emerged in Wuhan, China). Dyson *et al.* [16] analysed  
60 epidemiological data from England, and projected the course of the outbreak in that country if a  
61 variant emerged with different transmission characteristics. They warned that a variant with high  
62 transmissibility or substantial immune escape properties had the potential to generate large numbers  
63 of infections and hospitalisations.

64 Meanwhile, experimental and statistical studies have explored the effects of prior infections with  
65 related viruses on infections with different SARS-CoV-2 variants. Some studies have found previous  
66 infections with other SARS-CoV-2 variants to have a protective effect. For example, Wratil *et al.*  
67 [17] demonstrated that a combination of infection and vaccination induced hybrid immunity is  
68 protective against SARS-CoV-2 variants including the Omicron variant. A recent analysis of  
69 infection data from Portugal found that previous SARS-CoV-2 infections were protective against  
70 infection with the BA.5 Omicron subvariant, with the level of protection particularly high in  
71 individuals who were previously infected by the BA.1 or BA.2 Omicron subvariants [18]. However,  
72 some studies have indicated that prior infection with other SARS-CoV-2 variants may instead have a  
73 detrimental effect on subsequent infections with novel SARS-CoV-2 variants. For example, infection  
74 with the SARS-CoV-2 wild type was found to inhibit the immune response to infections with the  
75 Omicron variant among triple vaccinated healthcare workers [6].

76 Similarly to the cross-reactive immunity conferred by other SARS-CoV-2 variants, the impact of  
77 prior infections with seasonal coronaviruses on subsequent infections by SARS-CoV-2 is also  
78 unclear. Some analyses have found that previous infections with seasonal coronaviruses are likely to  
79 be protective against SARS-CoV-2 infection. The SARS-CoV-2 spike protein can be divided into the  
80 S1 and S2 subunits. The S1 subunit contains an antigenically variable receptor binding domain, while  
81 the S2 subunit is more conserved between coronaviruses. Kaplonek *et al.* [19] showed that SARS-  
82 CoV-2 S2 antibody responses are associated with milder COVID-19 symptoms, suggesting that  
83 previous infection with seasonal coronaviruses may lead to COVID-19 infections being less severe.  
84 Furthermore, strong and multispecific cross-reactive T-cell responses induced by seasonal  
85 coronavirus infection prior to SARS-CoV-2 infection have been associated with protection against  
86 SARS-CoV-2 infection in seronegative healthcare workers [6,20].

87 In contrast, there is also evidence that previous infections with seasonal coronaviruses can have  
88 detrimental effects on susceptibility to and outcomes of infection with SARS-CoV-2. With respect to  
89 disease outcomes, McNaughton *et al.* [21] showed that prior immunity to seasonal coronaviruses was  
90 positively associated with fatal outcomes in individuals with severe COVID-19. Similar results were  
91 found by Smit *et al.* [22] in an independent cohort. Conflicting results to Kaplonek *et al.* [19] were  
92 found by Garrido *et al.* [23], who found that S2 antibody responses were associated with greater  
93 disease severity. With respect to susceptibility, Wratil *et al.* [24] demonstrated that reactive cross-  
94 immunity imparted by seasonal coronaviruses may increase susceptibility to SARS-CoV-2.  
95 Additionally, a modelling analysis by Pinotti *et al.* [25] has suggested that the general trend of  
96 increased severity of SARS-CoV-2 infections in older individuals may be explained by an increased  
97 chance that older individuals have been exposed to seasonal coronaviruses.

98 Given this conflicting evidence in the literature, and to help understand the possible effects of prior  
99 infections on the risk of emergence of SARS-CoV-2 variants, in this study we develop a  
100 mathematical model considering two viruses: a novel SARS-CoV-2 variant and an antigenically  
101 related virus that has previously spread in the population. We investigate the factors affecting the risk  
102 that the novel variant invades the host population. We assume that infection with the previously  
103 circulating virus affects the chance of successful infection with, and subsequent transmission of, the  
104 novel variant, considering scenarios in which prior infection is either protective (partially or  
105 completely) or detrimental. We show that the level of cross-reactive immunity between novel SARS-  
106 CoV-2 variants and antigenically related viruses is a key factor determining whether or not a novel  
107 variant will invade the host population. This highlights the need to conduct a rapid assessment of the  
108 level of cross-reactive immunity between previously circulating viruses and newly emerged SARS-  
109 CoV-2 variants whenever a novel SARS-CoV-2 variant is introduced into a new host population.

110

## 111 2 Methods

### 112 2.1 Epidemiological model

113 We consider the introduction of a novel variant to a population consisting of  $N$  hosts. We assume that  
114 prior immunity has been conferred by infections with a related virus that has already spread within  
115 the host population. Assuming that this previously circulating virus follows dynamics that are  
116 characterised by the standard (deterministic) SEIR model, the number of individuals in the population  
117 that have been previously infected by that virus is given by the solution,  $N_p$ , to the final size equation  
118 [9],

$$119 \quad N_p = N - Ne^{-\frac{R_{0p}N_p}{N}}. \quad (1)$$

120 In this expression,  $R_{0p}$  is the reproduction number of the previously circulating virus, which we  
121 assume accounts for any interventions that were introduced (prior to, or immediately after, its arrival  
122 in the host population) to limit its spread. We assume that  $N_p$  individuals were previously infected by  
123 that virus (we round  $N_p$  to the nearest integer value), and the remaining  $N - N_p$  individuals in the  
124 population are immunologically naïve (i.e. they do not carry any immunity against the novel variant).

125 We then model the emergence of the novel variant. If an individual has previously been infected by  
126 the related virus, their susceptibility to the novel variant is assumed to be modified by a factor  $1 - \alpha$   
127 (relative to the susceptibility of a host who has not previously been infected by the related virus).

128 Consequently, if  $\alpha > 0$ , prior infection with the related virus is protective against infection with the  
129 novel variant. If instead if  $\alpha = 0$ , then earlier infection with the related virus does not affect the risk  
130 of infection with the novel variant. If  $\alpha < 0$ , earlier infection with the related virus promotes  
131 infection with the novel variant. Similarly, the infectiousness of a host infected with the novel variant  
132 who has previously been infected by the related virus is modified by a factor  $1 - \varepsilon$  (relative to the  
133 infectiousness of a host who has not previously been infected by the related virus). Again, positive

134 (negative) values of  $\varepsilon$  reflect scenarios in which prior infection with the related virus reduces  
135 (increases) the infectiousness of an individual who is infected with the novel variant.

136 Transmission dynamics for the novel variant are also modelled using an SEIR model, but with two  
137 main differences compared to the dynamics of the previously circulating virus. First, the SEIR model  
138 for the novel variant is extended to account for cross-reactive immunity conferred by the related  
139 virus. Second, since we are modelling invasion, we use a stochastic model in which, in each  
140 simulation of the model, the novel variant may either invade the host population or fade out with few  
141 infections. The analogous deterministic model to the stochastic model that we consider for the novel  
142 variant is given by:

$$143 \quad \frac{dS_n}{dt} = -\beta I_n S_n - \beta(1 - \varepsilon) I_p S_n, \quad \frac{dE_n}{dt} = \beta I_n S_n + \beta(1 - \varepsilon) I_p S_n - \gamma E_n,$$

$$144 \quad \frac{dI_n}{dt} = \gamma E_n - \mu I_n, \quad \frac{dR_n}{dt} = \mu I_n,$$

$$145 \quad \frac{dS_p}{dt} = -\beta(1 - \alpha) I_n S_p - \beta(1 - \varepsilon)(1 - \alpha) I_p S_p,$$

$$146 \quad \frac{dE_p}{dt} = \beta(1 - \alpha) I_n S_p + \beta(1 - \varepsilon)(1 - \alpha) I_p S_p - \gamma E_p, \quad \frac{dI_p}{dt} = \gamma E_p - \mu I_p, \quad \frac{dR_p}{dt} = \mu I_p. \quad (2)$$

147 In these equations, the variables  $S_n$ ,  $E_n$ ,  $I_n$  and  $R_n$  refer to the infection status (with the novel variant)  
148 of individuals who have not been infected previously by the related virus, and  $S_p$ ,  $E_p$ ,  $I_p$  and  $R_p$  refer  
149 to the infection status of individuals who have previously been infected by the related virus. A  
150 schematic illustrating the transitions of individuals between these states, and the rates at which those  
151 transitions occur, is shown in Fig 1A. The parameter  $\beta$  is the infection rate parameter, and the mean  
152 latent period and infectious period are  $1/\gamma$  days and  $1/\mu$  days, respectively. We define the  
153 reproduction number of the novel variant to be  $R_{0n} = \frac{\beta N}{\mu}$ , reflecting the transmission potential of the  
154 novel variant if the host population is entirely immunologically naïve.

155 As noted above, since we are interested in the risk of invasion of the novel variant, we use the  
156 analogous stochastic model to system of equations (2) rather than solving the differential equations  
157 numerically. We run model simulations using the direct method version of the Gillespie stochastic  
158 simulation algorithm [26] until the novel variant fades out (i.e.  $E_n + I_n + E_p + I_p$  reaches zero). The  
159 parameter values used in our main analyses are given in Table 1.

## 160 **2.2 Risk of invasion**

161 When the novel variant is introduced, we approximate the probability that it invades the population  
162 analytically. To do this, we assume that infections occur according to a branching process [27–30].  
163 Specifically, we denote by  $q_{ij}$  the probability that the novel variant fails to invade the host  
164 population, starting from  $i$  currently infected individuals who are immunologically naïve and  $j$   
165 currently infected individuals who were previously infected by the related virus. In this analysis,  
166 “currently infected” individuals refer to those who are either exposed or infectious, since exposed and  
167 infectious individuals are each expected to infect the same number of other hosts in future. This is  
168 because exposed individuals are not yet infectious, and only start generating infections when they  
169 move into the infectious compartments in the model.

170 We then consider the probability of the novel variant failing to establish in the host population  
171 starting from a single currently infected individual who was previously immunologically naïve,  $q_{10}$ .  
172 As in similar previous branching process analyses [31–34], we consider the various possibilities for  
173 what happens next: either that individual infects another individual who was also previously  
174 immunologically naïve (with probability  $\frac{\beta(N-N_p)}{\beta(N-N_p)+\beta(1-\alpha)N_p+\mu}$ ); or, that individual infects someone  
175 who was previously infected with the related virus (with probability  $\frac{\beta(1-\alpha)N_p}{\beta(N-N_p)+\beta(1-\alpha)N_p+\mu}$ ); or, that  
176 individual recovers without infecting anyone else (with probability  $\frac{\mu}{\beta(N-N_p)+\beta(1-\alpha)N_p+\mu}$ ). Applying  
177 the law of total probability therefore gives

$$178 \quad q_{10} = \frac{\beta(N-N_p)}{\beta(N-N_p)+\beta(1-\alpha)N_p+\mu} q_{20} + \frac{\beta(1-\alpha)N_p}{\beta(N-N_p)+\beta(1-\alpha)N_p+\mu} q_{11} + \frac{\mu}{\beta(N-N_p)+\beta(1-\alpha)N_p+\mu} q_{00}.$$

179 Instead starting from a single infected individual who was previously infected by the related virus  
180 gives

$$181 \quad q_{01} = \frac{\beta(1-\varepsilon)(N-N_p)}{\beta(1-\varepsilon)(N-N_p)+\beta(1-\varepsilon)(1-\alpha)N_p+\mu} q_{11} + \frac{\beta(1-\varepsilon)(1-\alpha)N_p}{\beta(1-\varepsilon)(N-N_p)+\beta(1-\varepsilon)(1-\alpha)N_p+\mu} q_{02} +$$

$$182 \quad \frac{\mu}{\beta(1-\varepsilon)(N-N_p)+\beta(1-\varepsilon)(1-\alpha)N_p+\mu} q_{00}.$$

183 We then assume that infections occur according to a branching process (so that  $q_{20} = q_{10}^2$ ; as  
184 infection lineages failing to establish starting from two infected hosts requires the infection lineages  
185 from both infected hosts to fail independently [31–33]). Making similar approximations throughout  
186 the equations above, and noting that  $q_{00} = 1$  (since the novel variant will not invade if there are no  
187 infected individuals) gives

$$188 \quad q_{10} = \frac{\beta(N-N_p)}{\beta(N-N_p)+\beta(1-\alpha)N_p+\mu} q_{10}^2 + \frac{\beta(1-\alpha)N_p}{\beta(N-N_p)+\beta(1-\alpha)N_p+\mu} q_{10}q_{01} + \frac{\mu}{\beta(N-N_p)+\beta(1-\alpha)N_p+\mu},$$

$$189 \quad q_{01} = \frac{\beta(1-\varepsilon)(N-N_p)}{\beta(1-\varepsilon)(N-N_p)+\beta(1-\varepsilon)(1-\alpha)N_p+\mu} q_{10}q_{01} + \frac{\beta(1-\varepsilon)(1-\alpha)N_p}{\beta(1-\varepsilon)(N-N_p)+\beta(1-\varepsilon)(1-\alpha)N_p+\mu} q_{01}^2 + \frac{\mu}{\beta(1-\varepsilon)(N-N_p)+\beta(1-\varepsilon)(1-\alpha)N_p+\mu}. \quad (3)$$

190 The probability of invasion starting from one infected individual who was previously  
191 immunologically naïve,  $p_{10}$ , and the probability of invasion starting from one infected individual  
192 who was previously infected by the related virus,  $p_{01}$ , are then given by  $p_{10} = 1 - q_{10}$  and  $p_{01} =$   
193  $1 - q_{01}$ , where  $q_{10}$  and  $q_{01}$  are the minimal non-negative solutions of system of equations (3) [35].

### 194 2.3 Special cases

195 In general, we solve system of equations (3) numerically. However, an analytic solution is possible in  
196 some special cases.



197 For example, in a scenario in which previous infection with the related virus is entirely protective  
198 against infection with the novel variant, then  $\alpha = 1$ . In that case, since a previously infected  
199 individual cannot be infected with the novel variant, then  $p_{01}$  does not apply. However, in that  
200 scenario,  $p_{10} = 1 - \frac{\mu}{\beta(N-N_p)}$  (whenever  $\frac{\beta(N-N_p)}{\mu} > 1$ ; otherwise, the novel variant will never establish  
201 in the host population). This can be seen by substituting  $\alpha = 1$  into the first equation of system of  
202 equations (3), solving the resulting quadratic equation for  $q_{10}$  (taking the minimal non-negative  
203 solution [35]), and then calculating  $p_{10} = 1 - q_{10}$ . In a scenario in which the related virus has not  
204 previously spread in the host population, then this solution for  $p_{10}$  is identical to the classic branching  
205 process estimate for the probability of a major outbreak,  $p_{10} = 1 - \frac{1}{R_{0n}}$  [28,36,37].

206 Alternatively, we can consider a scenario in which prior infection with the related virus eliminates  
207 the infectiousness of a host infected by the novel variant (i.e. the individual can become infected, but  
208 the virus cannot then establish, so onwards transmission cannot occur). In that case,  $\varepsilon = 1$  and so – in  
209 a similar fashion to above – we obtain  $p_{10} = 1 - \frac{\mu}{\beta(N-N_p)}$  (whenever  $\frac{\beta(N-N_p)}{\mu} > 1$ ) and  $p_{01} = 0$ .

210 Again, in a scenario in which a related virus has not previously spread in the population, this is the  
211 classic estimate for the probability of a major outbreak,  $p_{10} = 1 - \frac{1}{R_{0n}}$  [28,36,37].

212 Finally, in a scenario in which previous infection by the related virus does not affect the dynamics of  
213 the novel variant (so that  $\alpha = \varepsilon = 0$ ), we expect the risk of novel variant invasion to be independent  
214 of whether or not the initial infected individual has previously been infected by the related virus. In  
215 other words, we expect  $q_{10} = q_{01}$ . In this case, system of equations (3) reduces to a single quadratic  
216 equation for  $q_{10}$ . Taking the minimal non-negative solution of that equation [35] indicates that  
217  $p_{10} = p_{01} = 1 - q_{10} = 1 - \frac{1}{R_{0n}}$  (whenever  $R_{0n} > 1$ ; otherwise the novel variant will never establish  
218 in the host population).

### 219 3 Results

220 To investigate the effects of prior infection by an antigenically related virus on the epidemiological  
221 dynamics of a newly emerged variant, we first ran stochastic simulations of the analogous stochastic  
222 model to system of equations (2). Representative time series of the dynamics illustrate that, if the  
223 novel variant successfully spreads in the host population, outbreaks tend to have a lower peak  
224 number of infections and have a longer duration when cross-reactive immunity has a protective effect  
225 (Fig 1B), compared to when prior infection by the related virus has no effect (Fig 1C). In contrast, if  
226 prior infection by the related virus instead promotes infection by the novel variant, outbreaks tend to  
227 have a higher peak number of infections and a shorter duration (Fig 1D).

228 However, rather than focusing on the dynamics of outbreaks once the novel variant has invaded the  
229 host population, our main goal was to quantify the risk of the novel variant successfully invading in  
230 the first place (as opposed to fading out with few cases). We therefore calculated the risk of the novel  
231 variant invading the population, starting from the introduction of a single case to the population (Fig  
232 2). We not only calculated this quantity by numerically solving system of equations (3) (Fig 2 - red  
233 dotted and dashed lines), but also confirmed that these numerical approximations matched estimates  
234 of the invasion probability obtained using large numbers of simulations of the stochastic model (Fig  
235 2 - black dots and crosses).

236 We found that, when previous infection with the related virus is completely protective against the  
237 novel variant (i.e.  $\alpha = \varepsilon = 1$ ), then the reproduction number of the novel variant must be higher than  
238 the reproduction number of the antigenically related virus in order for the novel variant to invade.  
239 Specifically, in Fig 2A (in which  $R_{0p} = 1.5$ , as marked by the vertical blue dotted line), the  
240 probability of the novel variant invading the host population is zero unless  $R_{0n} > R_{0p}$ , and indeed  
241 remains zero whenever  $R_{0n}$  is only slightly larger than  $R_{0p}$ . This can be explained analytically as  
242 follows. The previously circulating virus will spread around the population until sufficiently many

243 individuals have been infected for herd immunity (to the previous virus) to be reached. This occurs  
244 when  $N \left(1 - \frac{1}{R_{0p}}\right)$  individuals have become infected [38]. However, at this point, infections do not  
245 stop immediately: there is an “overshoot” in infections while transmission slows and the previously  
246 circulating virus fades out. As a result, a lower bound on the final size of the outbreak caused by the  
247 previously circulating virus is  $N_p > N \left(1 - \frac{1}{R_{0p}}\right)$ . As noted in the Methods (Special cases), in a  
248 scenario involving complete cross-reactive immunity, the novel variant can only invade the  
249 population if  $\frac{\beta(N-N_p)}{\mu} > 1$ , or equivalently  $R_{0n} > \frac{N}{N-N_p}$ . Substituting the lower bound for  $N_p$  into this  
250 expression shows that invasion of the novel variant requires  $R_{0n} > R_{0p}$ .

251 In contrast, if cross-reactive immunity is only partial, then the novel variant may invade for lower  
252 values of  $R_{0n}$  (Fig 2B). This can include scenarios in which  $R_{0n} < R_{0p}$  (in some cases lying between  
253 those shown in Fig 2B and Fig 2C). As noted in the Methods, when previous infection by the  
254 antigenically related virus does not affect the epidemiological dynamics of the novel variant, then the  
255 novel variant can only invade if  $R_{0n} > 1$  (Fig 2C), mirroring the classical result for models in which  
256 cross-reactive immunity is not accounted for [36]. Finally, in scenarios in which prior infection by  
257 the related virus promotes infection with the novel variant, the novel variant can invade even if  $R_{0n}$  is  
258 small. This includes scenarios in which  $R_{0n} < 1$  (Fig 2D).

259 In Fig 2, we note that the immune status of the initial infected individual affects the risk that the  
260 novel variant will invade the host population. In particular, when cross-reactive immunity is  
261 protective, we found that the probability of invasion is higher if the initially infected host had not  
262 previously been infected by the related virus (Fig 2B). In contrast, if cross-reactive immunity  
263 promotes infection with the novel variant, then the probability of the novel variant invading is higher

264 if the initial infection arose in an individual who had previously been infected with the related virus  
265 (Fig 2D).

266 We then explored how the probability of invasion of the novel variant depends on the susceptibility-  
267 and infectiousness-modifying effects of cross-reactive immunity individually (Fig 3). We found that  
268 the values of  $\alpha$  and  $\varepsilon$  affect the probability of a major outbreak differently. This is because, starting  
269 from a single infected individual, the number of infections generated by that individual is crucial in  
270 determining whether or not a novel variant will invade. If the first infected host infects multiple  
271 others, then all of those individuals' transmission lineages must fade out in order for invasion to fail  
272 to occur. Hence, invasion is much more likely to occur if the first infected individual infects many  
273 individuals. Starting from a single infected individual who was not previously infected by the related  
274 virus, only susceptibility-reducing immunity (characterised by  $\alpha$ ) affects the number of infections  
275 generated by the first infected individual. As such, the probability of invasion in this case is more  
276 sensitive to  $\alpha$  than to  $\varepsilon$  (Fig 3A).

277 In contrast, if the first infected individual was previously infected by the related virus, then  
278 infectiousness-reducing immunity (characterised by  $\varepsilon$ ) also affects the probability of this individual  
279 infecting any other member of the population. In fact,  $\varepsilon$  then affects all potential transmissions  
280 generated by the first infected individual, whereas  $\alpha$  only affects potential transmissions to part of the  
281 population (those individuals who were previously infected by the related virus). In that scenario, the  
282 probability of a major outbreak is therefore slightly more sensitive to  $\varepsilon$  than  $\alpha$  (Fig 3B). The different  
283 effects of susceptibility-reducing and infectiousness-reducing cross-reactive immunity therefore  
284 explain the asymmetric nature of the contours about the diagonal  $\varepsilon = \alpha$  in Fig 3.

285

286

## 287 4 Discussion

288 The epidemiological dynamics of the COVID-19 pandemic have been shaped by the emergence of  
289 different SARS-CoV-2 variants. However, not all variants that have appeared have propagated and  
290 caused a large number of cases. Most novel variants have faded out, with relatively few variants  
291 being responsible for the vast majority of SARS-CoV-2 infections.

292 Here, we have developed a mathematical model to investigate the impact of cross-reactive immunity  
293 (generated by previous infections by related viruses) on the probability that a newly introduced  
294 variant will invade the host population. We found that, if prior infection with a related virus has a  
295 strong protective effect, then the novel variant must be more infectious than the related virus to be  
296 able to invade the host population (Fig 2A). If instead, however, the previously circulating virus has a  
297 very weak protective effect or no protective effect on infection with the novel variant, then the risk of  
298 invasion of the novel variant is unaffected by the outbreak of the related virus, and so the invasion  
299 probability matches the well-known estimate for the “probability of a major outbreak” (Fig 2C)  
300 [28,36,37]. If prior infection with the related virus promotes infection by the novel variant, as has  
301 been proposed in some studies exploring the impact of prior infections by SARS-CoV-2 or seasonal  
302 coronaviruses on infections with SARS-CoV-2 variants, then even novel variants with limited  
303 transmissibility are able to invade (Fig 2D).

304 We further showed that the immune status of the first individual in the population infected by the  
305 novel variant affects the probability that the novel variant invades (Figs 2 and 3). This is in turn  
306 influenced by the pathway by which the novel variant is introduced into the host population. If the  
307 variant is introduced from elsewhere, for example by an incoming traveller [1,39], then it may be  
308 introduced by someone who was not previously infected by the related virus. If instead it appears as a  
309 result of mutation from a related virus within the local population (as was likely the case for the

310 emergence of the Alpha variant in Kent, England [40]), then the initial infected case would be an  
311 individual who was previously infected by the related virus.

312 Previous modelling studies have explored the risk of a novel virus invading when it is introduced to a  
313 host population, including scenarios in which the pathogen evolves to facilitate emergence [41–45].

314 Of significant relevance to our study, Hartfield and Alizon [46] applied a branching process model to  
315 investigate the invasion probability in a scenario in which a resident pathogen strain that confers  
316 cross-immunity is spreading in the host population, and considered Chikungunya virus as a case  
317 study. Those authors demonstrated that a simple estimate for the probability of a major outbreak  
318 overestimates the invasion probability in that scenario, due to the potential for depletion of  
319 susceptible individuals by the resident strain over the timescale of invasion of the novel virus.

320 Echoing this result in a single strain setting, Sachak-Patwa *et al.* [47] showed that simple estimates  
321 for the probability of a major outbreak are overestimates if the pathogen enters the host population  
322 during a vaccination campaign, again due to susceptible depletion occurring within the period of the  
323 pathogen either invading or fading out. Other researchers have investigated the emergence of a novel  
324 pathogen strain that is introduced to the population when a resident strain is endemic [48]. In contrast  
325 to previous studies, we focus on a scenario in which a related virus has already spread widely around  
326 the host population and caused a completed outbreak, rather than being resident in the host  
327 population. An additional novel aspect of the current study is that we conduct a thorough  
328 investigation of the effect of different levels of cross-reactive immunity, including scenarios in which  
329 prior infection with an antigenically related virus can promote infection with the novel variant.

330 Although such scenarios may seem counterintuitive, recent evidence suggests that there is a clear  
331 possibility that infection-promoting cross-reactivity may occur, as described in the Introduction.

332 To understand general principles governing the relationship between cross-reactive immunity and the  
333 risk of invasion of a novel variant, we constructed the simplest possible model in this study. Further

334 developments could involve including additional epidemiological and evolutionary detail in our  
335 transmission model, particularly if it is to be used to predict emergence of specific variants rather  
336 than to understand general principles. For example, in the model considered here, the infectious  
337 period of individuals infected by the novel variant is assumed to follow an exponential distribution.  
338 However, gamma distributions have been found to represent observed epidemiological periods more  
339 accurately than exponential distributions [49,50], and gamma-distributed infectious periods can be  
340 incorporated into calculations of invasion probabilities [51,52]. We also assumed a fixed level of  
341 cross-reactive immunity for all individuals who were previously infected by the related virus. In  
342 reality, immunity is heterogeneous between different previously infected hosts, and is likely to wane  
343 over time [53,54]. Waning immunity has been included previously in a range of epidemiological  
344 models [55,56], and is a target for future study in the modelling framework presented here.

345 In summary, understanding the risk posed by a novel variant requires the degree of cross-reactive  
346 immunity between the new variant and previously circulating viruses to be assessed. In scenarios in  
347 which previous infections by antigenically related viruses have a limited effect, or promote infection  
348 with the novel variant, then the risk of the variant invading the host population successfully is  
349 substantially higher than in scenarios in which previous infections by related viruses are protective.  
350 Given the impact that different variants have had on transmission and control during the COVID-19  
351 pandemic, fast detection and analysis of novel variants is essential for both national and global public  
352 health.

353 **Figures**

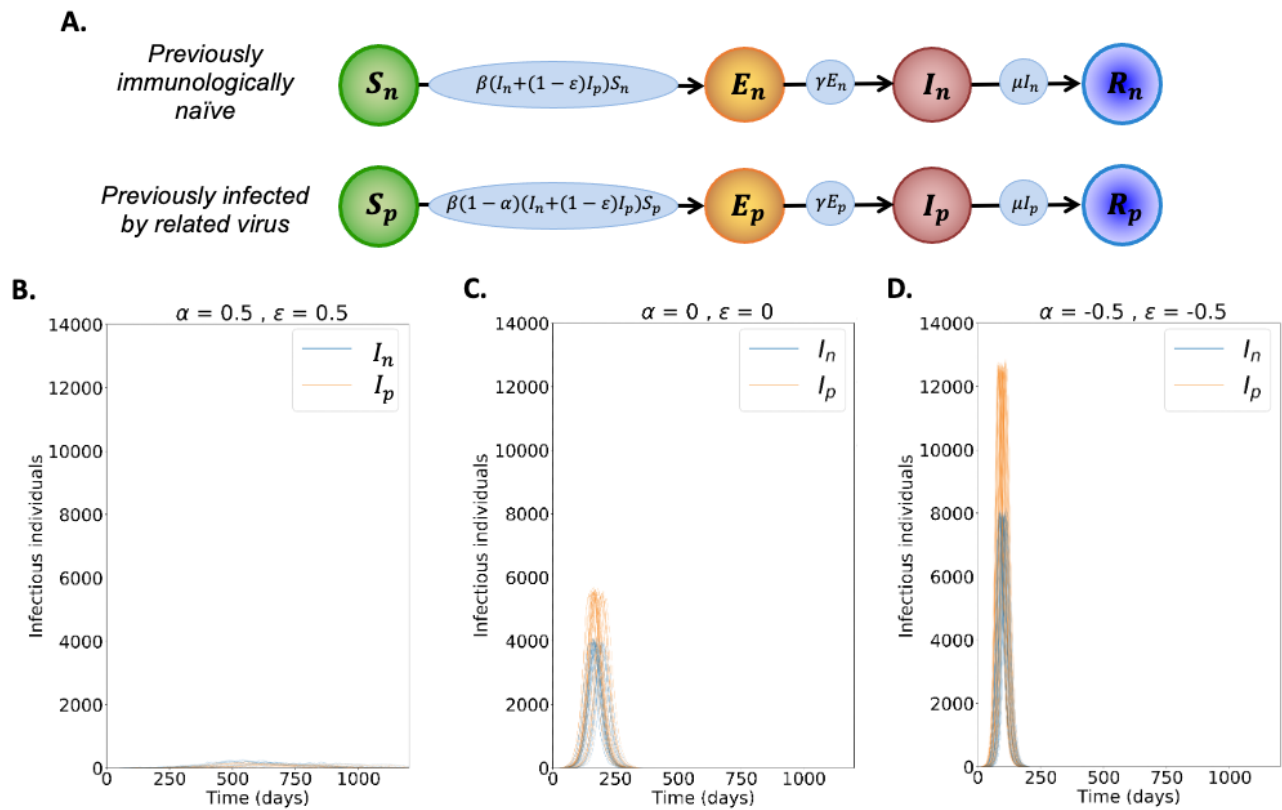

354

355 Figure 1. Dynamics of the novel variant invading a population in which a related virus has previously spread. A.

356 Schematic showing the transitions (and their rates) in the stochastic model of novel variant invasion (the analogous

357 stochastic model to system of equations (2)). B. Realisations of 50 stochastic simulations of the model, for  $R_{0n} = 2$  and

358 with protective cross-reactive immunity ( $\alpha = \epsilon = 0.5$ ; other parameter values are as stated in Table 1). Orange lines

359 represent the number of individuals infected by the novel variant who were previously infected by the related virus ( $I_p$ ),

360 and blue lines represent the number of individuals infected by the novel variant who were previously immunologically

361 naïve ( $I_n$ ). C. Analogous to panel B, but with no cross-reactive immunity ( $\alpha = \epsilon = 0$ ). D. Analogous to panel B, but with

362 cross-reactive immunity instead promoting infection with the novel variant ( $\alpha = \epsilon = -0.5$ ). Simulations were initiated

363 with a single infected, previously immunologically naïve individual ( $I_n = 1$ ), with all other individuals susceptible ( $S_n =$

364  $N - N_p - 1$  and  $S_p = N_p$ , where  $N_p$  is the solution of the final size equation for the previously circulating virus, equation

365 (1), rounded to the nearest integer value).



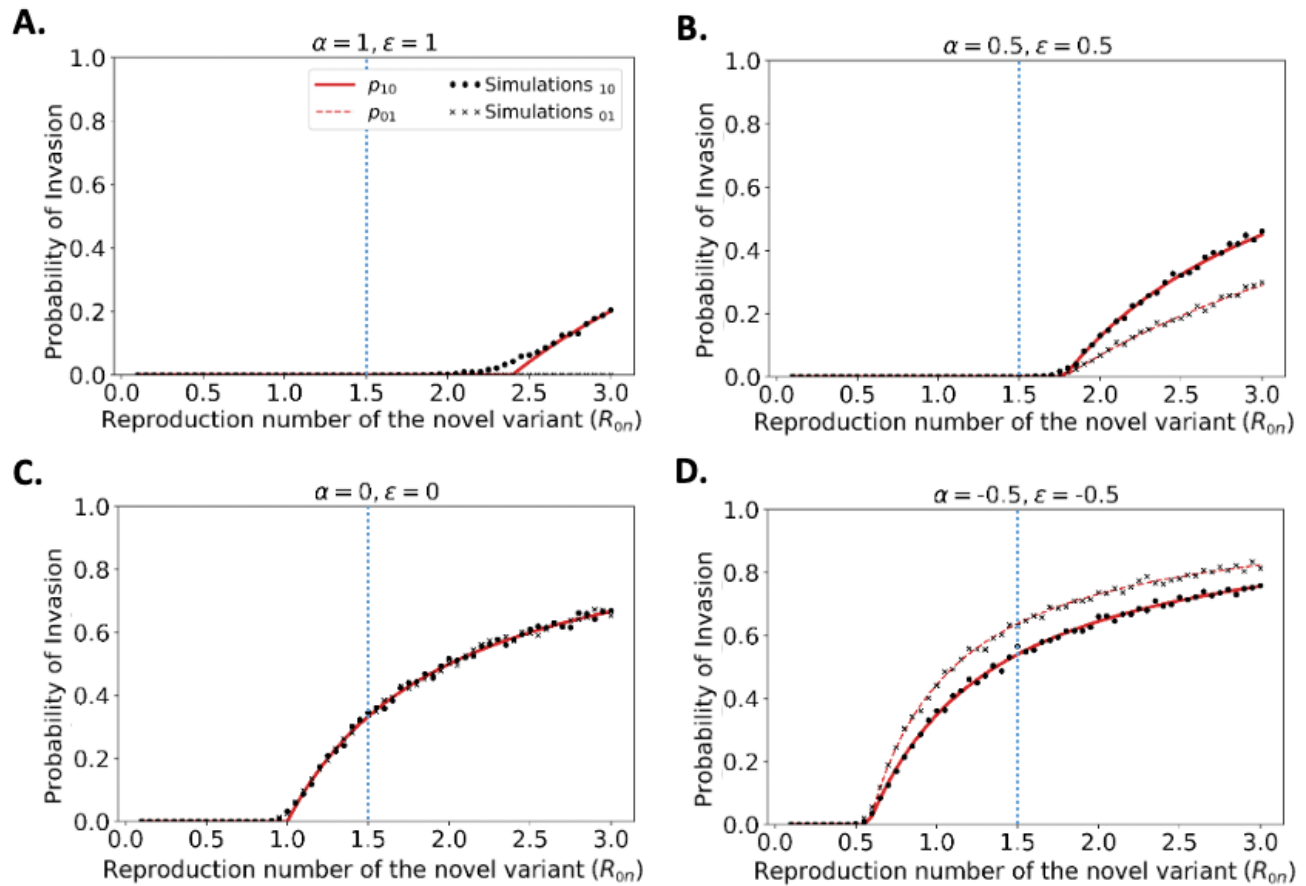

366

367 Figure 2. Probability of the novel variant invading the host population, starting from the introduction of a single  
368 infectious individual. A. The probability of the novel variant invading under an assumption of perfectly protective cross-  
369 reactive immunity ( $\alpha = \epsilon = 1$ ). Results are shown both for analytic approximations of the invasion probability calculated  
370 using system of equations (3) (either starting from a single infected individual who was previously immunologically  
371 naïve (red solid) or starting from a single infected individual who was previously infected by the related virus (red  
372 dashed)) and for the invasion probability calculated using stochastic simulations (either starting from a single infected  
373 individual who was previously immunologically naïve (black dots) or starting from a single infected individual who was  
374 previously infected by the related virus (black crosses)). The vertical blue dotted line represents the reproduction number  
375 of the previously circulating virus ( $R_{0p} = 1.5$ ). B. Analogous results to panel A, but with partial protective cross-reactive  
376 immunity ( $\alpha = \epsilon = 0.5$ ). C. Analogous results to panel A, but with no cross-reactive immunity ( $\alpha = \epsilon = 0$ ). D.  
377 Analogous to panel A, but with cross-reactive immunity instead promoting infection with the novel variant ( $\alpha = \epsilon =$   
378  $-0.5$ ). In the simulations, the probability of invasion was calculated as the proportion of simulations in which the number  
379 of simultaneously infected individuals ( $I_n + I_p$ ) exceeded 15 at any time. As in Fig 1, the division of the host population  
380 between individuals who were previously immunologically naïve and those who were infected by the related virus was

381 calculated based on the final size equation for the previously circulating virus (equation (1)). Other parameter values used  
382 are shown in Table 1.

383

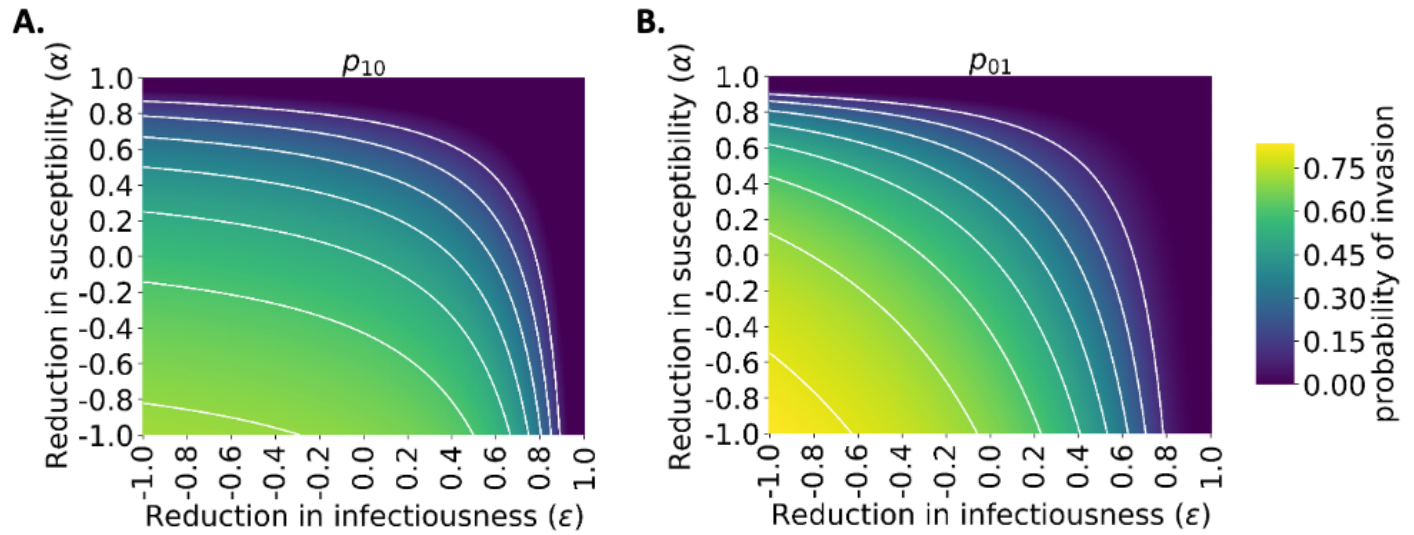

384

385 Figure 3. Probability of the novel variant invading the host population, starting from the introduction of a single  
386 infectious individual, for different levels of cross-reactive immunity affecting susceptibility and infectiousness  
387 individually. The invasion probability is approximated analytically using system of equations (3). A. The probability of  
388 the novel variant invading, starting from a single infected individual who was previously immunologically naïve. B.  
389 Analogous to panel A, but starting from a single infected individual who was previously infected by the related virus.  
390 White lines represent contours of constant probability of invasion of the novel variant. As in Fig 1, the division of the  
391 host population between individuals who were previously immunologically naïve and those who were infected by the  
392 related virus was calculated based on the final size equation for the previously circulating virus (equation (1)). Other  
393 parameter values used are shown in Table 1.

394

395

396

397

398

399 **Table**

400 Table 1. Illustrative parameter values used in model simulations.

| Parameter     | Meaning                                                                                      | Value used                                                                                                                             |
|---------------|----------------------------------------------------------------------------------------------|----------------------------------------------------------------------------------------------------------------------------------------|
| $N$           | Size of local host population                                                                | 100,000                                                                                                                                |
| $1/\gamma$    | Mean latent period of novel variant                                                          | 5 days [57,58]                                                                                                                         |
| $1/\mu$       | Mean infectious period of novel variant                                                      | 8 days [59–61]                                                                                                                         |
| $R_{0p}$      | Reproduction number of previously circulating virus (accounting for interventions)           | 1.5, so that $N_p = 58,281$ individuals are assumed to have been infected by the previously circulating virus (~58% of the population) |
| $R_{0n}$      | Reproduction number of novel variant (accounting for interventions)                          | Varies (see figures)                                                                                                                   |
| $\beta$       | Transmission rate of novel variant                                                           | Set so that $R_{0n} = \frac{\beta N}{\mu}$                                                                                             |
| $\alpha$      | Reduction (positive) or increase (negative) in susceptibility due to cross-reactive immunity | Varies (see figures)                                                                                                                   |
| $\varepsilon$ | Reduction (positive) or increase (negative) in infectiousness due to cross-reactive immunity | Varies (see figures)                                                                                                                   |

401

402 **Conflict of Interest**

403 The authors declare that the research was conducted in the absence of any commercial or financial  
404 relationships that could be construed as a potential conflict of interest.

405 **Author Contributions**

406 Conceptualisation: RNT, CPT, SI, UO; Methodology: RNT, UO, ES, FLR; Formal analysis: RNT,  
407 ES, YD, UO; Supervision: RNT, UO; Writing – Original draft: RNT, CPT, UO; Writing – Review  
408 and editing: All authors.

409 **Funding**

410 RNT was funded by the EPSRC through the Mathematics for Real-World Systems CDT (grant number  
411 EP/S022244/1). The collaboration between RNT and SI was supported by an International Exchange  
412 grant from the Royal Society (grant number IES\R3\193037) and a Computer Science Small Grant

413 from the London Mathematical Society. YD and UO were supported by a grant from Tel Aviv  
414 University Center for AI and Data Science in collaboration with Google, as part of the initiative of AI  
415 and Data Science for social good. FALR was funded by the BBSRC through the Oxford  
416 Interdisciplinary Bioscience DTP (grant number BB/M011224/1).

## 417 **Acknowledgments**

418 Thanks to members of the Zeeman Institute for Systems Biology and Infectious Disease  
419 Epidemiology Research for useful discussions about this work.

## 420 **Data Availability Statement**

421 Computing code developed to generate the results in the manuscript is available at  
422 <https://github.com/yairdaon/waning>

423

## 424 **References**

- 425 1. Daon Y, Thompson RN, Obolski U. Estimating COVID-19 outbreak risk through air travel. *J*  
426 *Trav Med.* 2020;27: taaa093.
- 427 2. Davies N, Abbott S, Barnard R, Jarvis C, Kucharski A, Munday J, et al. Estimated  
428 transmissibility and impact of SARS-CoV-2 lineage B.1.1.7 in England. *Science.* 2021;372:  
429 149.
- 430 3. Altarawneh HN, Chemaitelly H, Hasan MR, Ayoub HH, Qassim S, AlMukdad S, et al.  
431 Protection against the Omicron variant from previous SARS-CoV-2 infection. *N Engl J Med.*  
432 2022;386: 1288–1290.
- 433 4. Ferguson N, Ghani A, Cori A, Hogan A, Hinsley W, Volz E, et al. Report 49 - Growth,  
434 population distribution and immune escape of Omicron in England. 2021. Available:  
435 <https://www.imperial.ac.uk/mrc-global-infectious-disease-analysis/covid-19/report-49-omicron/>
- 436 5. Viana R, Moyo S, Amoako DG, Tegally H, Scheepers C, Althaus CL, et al. Rapid epidemic  
437 expansion of the SARS-CoV-2 Omicron variant in southern Africa. *Nature.* 2022;603: 679–686.
- 438 6. Reynolds CJ, Pade C, Gibbons JM, Otter AD, Lin K-M, Muñoz Sandoval D, et al. Immune  
439 boosting by B.1.1.529 (Omicron) depends on previous SARS-CoV-2 exposure. *Science.*  
440 2022;377: eabq1841.
- 441 7. Saunders IW. Epidemics in competition. *J Math Biol.* 1981;11: 311–318.
- 442 8. Allen L, Ackleh A. Competitive exclusion in SIS and SIR epidemic models with total cross  
443 immunity and density-dependent host mortality. *DCDS-B.* 2005;5: 175–188.
- 444 9. Thompson RN, Thompson CP, Pelerman O, Gupta S, Obolski U. Increased frequency of travel  
445 in the presence of cross-immunity may act to decrease the chance of a global pandemic. *Phil*  
446 *Trans Roy Soc B.* 2019;374: 20180274.

- 447 10. Amador J, Armesto D, Gómez-Corral A. Extreme values in SIR epidemic models with two  
448 strains and cross-immunity. *Math Biosci Eng.* 2019;16: 1992–2022.
- 449 11. Opatowski L, Baguelin M, Eggo RM. Influenza interaction with cocirculating pathogens and its  
450 impact on surveillance, pathogenesis, and epidemic profile: A key role for mathematical  
451 modelling. Hobman TC, editor. *PLoS Pathog.* 2018;14: e1006770.
- 452 12. Bhattacharyya S, Gesteland PH, Korgenski K, Bjørnstad ON, Adler FR. Cross-immunity  
453 between strains explains the dynamical pattern of paramyxoviruses. *Proc Natl Acad Sci.*  
454 2015;112: 13396–13400.
- 455 13. Bhatia S, Wardle J, Nash RK, Nouvellet P, Cori A. Report 47 - A generic method and software  
456 to estimate the transmission advantage of pathogen variants in real-time: SARS-CoV-2 as a  
457 case-study. 2021. Available: [https://www.imperial.ac.uk/mrc-global-infectious-disease-  
458 analysis/covid-19/report-47-mvepiestim/](https://www.imperial.ac.uk/mrc-global-infectious-disease-analysis/covid-19/report-47-mvepiestim/)
- 459 14. Cori A, Ferguson NM, Fraser C, Cauchemez S. A new framework and software to estimate  
460 time-varying reproduction numbers during epidemics. *Am J Epi.* 2013;178: 1505–12.
- 461 15. Thompson RN, Stockwin JE, van Gaalen RD, Polonsky JA, Kamvar ZN, Demarsh PA, et al.  
462 Improved inference of time-varying reproduction numbers during infectious disease outbreaks.  
463 *Epidemics.* 2019;29: 100356–100356.
- 464 16. Dyson L, Hill EM, Moore S, Curran-Sebastian J, Tildesley MJ, Lythgoe KA, et al. Possible  
465 future waves of SARS-CoV-2 infection generated by variants of concern with a range of  
466 characteristics. *Nat Commun.* 2021;12: 5730.
- 467 17. Wratil PR, Stern M, Priller A, Willmann A, Almanzar G, Vogel E, et al. Three exposures to the  
468 spike protein of SARS-CoV-2 by either infection or vaccination elicit superior neutralizing  
469 immunity to all variants of concern. *Nat Med.* 2022;28: 496–503.
- 470 18. Malato J, Ribeiro RM, Leite PP, Casaca P, Fernandes E, Antunes C, et al. Risk of BA.5  
471 infection among persons exposed to previous SARS-CoV-2 variants. *N Engl J Med.* 2022;387:  
472 953–954.
- 473 19. Kaplonek P, Wang C, Bartsch Y, Fischinger S, Gorman MJ, Bowman K, et al. Early cross-  
474 coronavirus reactive signatures of humoral immunity against COVID-19. *Sci Immunol.* 2021;6:  
475 eabj2901.
- 476 20. Swadling L, Diniz MO, Schmidt NM, Amin OE, Chandran A, Shaw E, et al. Pre-existing  
477 polymerase-specific T cells expand in abortive seronegative SARS-CoV-2. *Nature.* 2022;601:  
478 110–117.
- 479 21. McNaughton AL, Paton RS, Edmans M, Youngs J, Wellens J, Phalora P, et al. Fatal COVID-19  
480 outcomes are associated with an antibody response targeting epitopes shared with endemic  
481 coronaviruses. *JCI Insight.* 2022;7: e156372.
- 482 22. Smit WL, van Tol S, Wal S van der, van Vulpen F, la Grouw S, van Lelyveld L, et al.  
483 Heterologous Immune Responses of Serum IgG and Secretory IgA Against the Spike Protein of  
484 Endemic Coronaviruses During Severe COVID-19. *Front Immunol.* 2022;13: 839367.

- 485 23. Garrido JL, Medina MA, Bravo F, McGee S, Fuentes-Villalobos F, Calvo M, et al. IgG  
486 targeting distinct seasonal coronavirus- conserved SARS-CoV-2 spike subdomains correlates  
487 with differential COVID-19 disease outcomes. *Cell Rep.* 2022;39: 110904.
- 488 24. Wratil PR, Schmacke NA, Karakoc B, Dulovic A, Junker D, Becker M, et al. Evidence for  
489 increased SARS-CoV-2 susceptibility and COVID-19 severity related to pre-existing immunity  
490 to seasonal coronaviruses. *Cell Rep.* 2021;37: 110169.
- 491 25. Pinotti F, Wikramaratna PS, Obolski U, Paton RS, Damineli DSC, Alcantara LCJ, et al.  
492 Potential impact of individual exposure histories to endemic human coronaviruses on age-  
493 dependent severity of COVID-19. *BMC Med.* 2021;19: 19.
- 494 26. Gillespie DT. Exact stochastic simulation of coupled chemical reactions. *J Phys Chem.* 1977;8:  
495 2340–2361.
- 496 27. Ball F, Donnelly P. Strong approximations for epidemic models. *Stoch Proc Appl.* 1995;55: 1–  
497 21.
- 498 28. Britton T. Stochastic epidemic models: A survey. *Math Biosci.* 2010;225: 24–35.
- 499 29. Allen LJS, van den Driessche P. Relations between deterministic and stochastic thresholds for  
500 disease extinction in continuous- and discrete-time infectious disease models. *Math Biosci.*  
501 2013;243: 99–108.
- 502 30. Kaye AR, Hart WS, Bromiley J, Iwami S, Thompson RN. A direct comparison of methods for  
503 assessing the threat from emerging infectious diseases in seasonally varying environments. *J*  
504 *Theor Biol.* 2022;548: 111195.
- 505 31. Lovell-Read FA, Funk S, Obolski U, Donnelly CA, Thompson RN. Interventions targeting non-  
506 symptomatic cases can be important to prevent local outbreaks: SARS-CoV-2 as a case study. *J*  
507 *R Soc Interface.* 2021;18: 20201014.
- 508 32. Lovell-Read FA, Shen S, Thompson RN. Estimating local outbreak risks and the effects of non-  
509 pharmaceutical interventions in age-structured populations: SARS-CoV-2 as a case study. *J*  
510 *Theor Biol.* 2022;535: 110983.
- 511 33. Thompson RN, Gilligan CA, Cunniffe NJ. Will an outbreak exceed available resources for  
512 control? Estimating the risk from invading pathogens using practical definitions of a severe  
513 epidemic. *J R Soc Interface.* 2020;17: 20200690.
- 514 34. Thompson RN. Novel coronavirus outbreak in Wuhan, China, 2020: Intense surveillance is vital  
515 for preventing sustained transmission in new locations. *J Clin Med.* 2020;9: 498.
- 516 35. Norris JR. *Markov Chains.* Cambridge University Press; 1998.
- 517 36. Keeling MJ, Rohani P. *Modeling infectious diseases in humans and animals.* Princeton  
518 University Press; 2008.



- 519 37. Thompson RN, Gilligan CA, Cunniffe NJ. Detecting presymptomatic infection is necessary to  
520 forecast major epidemics in the earliest stages of infectious disease outbreaks. *PLoS Comp Biol.*  
521 2016;12: e1004836.
- 522 38. Britton T, Ball F, Trapman P. A mathematical model reveals the influence of population  
523 heterogeneity on herd immunity to SARS-CoV-2. *Science.* 2020;369: 846–849.
- 524 39. Creswell R, Augustin D, Bouros I, Farm HJ, Miao S, Ahern A, et al. Heterogeneity in the  
525 onwards transmission risk between local and imported cases affects practical estimates of the  
526 time-dependent reproduction number. *Phil Trans R Soc A.* 2022;380: 20210308.
- 527 40. Kraemer MUG, Hill V, Ruis C, Dellicour S, Bajaj S, McCrone JT, et al. Spatiotemporal  
528 invasion dynamics of SARS-CoV-2 lineage B.1.1.7 emergence. *Science.* 2021;373: 889–895.
- 529 41. Chabas H, Lion S, Nicot A, Meaden S, van Houte S, Moineau S, et al. Evolutionary emergence  
530 of infectious diseases in heterogeneous host populations. *PLoS Biol.* 2018;16: e2006738–  
531 e2006738.
- 532 42. Antia R, Regoes RR, Koella JC, Bergstrom CT. The role of evolution in the emergence of  
533 infectious diseases. *Nature.* 2003;426: 658–661.
- 534 43. Arinaminpathy N, McLean AR. Evolution and emergence of novel human infections. *Proc Roy*  
535 *Soc B.* 2009;276: 3937–3943.
- 536 44. Kubiak RJ, Arinaminpathy N, McLean AR. Insights into the evolution and emergence of a  
537 novel infectious disease. *PLoS Comp Biol.* 2010;6: e1000947.
- 538 45. Leventhal GE, Hill AL, Nowak MA, Bonhoeffer S. Evolution and emergence of infectious  
539 diseases in theoretical and real-world networks. *Nat Commun.* 2015;6: 6101.
- 540 46. Hartfield M, Alizon S. Epidemiological feedbacks affect evolutionary emergence of pathogens.  
541 *Am Nat.* 2014;183: E105–E117.
- 542 47. Sachak-Patwa R, Byrne HM, Dyson L, Thompson RN. The risk of SARS-CoV-2 outbreaks in  
543 low prevalence settings following the removal of travel restrictions. *Comms Med.* 2021;1: 39.
- 544 48. Meehan MT, Cope RC, McBryde ES. On the probability of strain invasion in endemic settings:  
545 Accounting for individual heterogeneity and control in multi-strain dynamics. *J Theor Biol.*  
546 2020;487: 110109.
- 547 49. Lloyd AL. Destabilization of epidemic models with the inclusion of realistic distributions of  
548 infectious periods. *Proc Roy Soc B.* 2001;268: 985–993.
- 549 50. Wearing HJ, Rohani P, Keeling MJ. Appropriate models for the management of infectious  
550 diseases. *PLoS Med.* 2005;2: 0621–0627.
- 551 51. Anderson D, Watson R. On the spread of a disease with gamma distributed latent and infectious  
552 periods. *Biometrika.* 1980;67: 191–8.
- 553 52. Thompson RN, Jalava K, Obolski U. Sustained transmission of Ebola in new locations: more  
554 likely than previously thought. *Lancet Inf Dis.* 2019;19: 1058–59.

- 555 53. Goldberg Y, Mandel M, Bar-On YM, Bodenheimer O, Freedman LS, Ash N, et al. Protection  
556 and waning of natural and hybrid immunity to SARS-CoV-2. *N Engl J Med.* 2022;386: 2201–  
557 2212.
- 558 54. Townsend JP, Hassler HB, Sah P, Galvani AP, Dornburg A. The durability of natural infection  
559 and vaccine-induced immunity against future infection by SARS-CoV-2. *Proc Natl Acad Sci*  
560 *USA.* 2022;119: e2204336119.
- 561 55. Carlsson R-M, Childs LM, Feng Z, Glasser JW, Heffernan JM, Li J, et al. Modeling the waning  
562 and boosting of immunity from infection or vaccination. *J Theor Biol.* 2020;497: 110265.
- 563 56. Le A, King AA, Magpantay FMG, Mesbahi A, Rohani P. The impact of infection-derived  
564 immunity on disease dynamics. *J Math Biol.* 2021;83: 61.
- 565 57. Xin H, Li Y, Wu P, Li Z, Lau EHY, Qin Y, et al. Estimating the latent period of Coronavirus  
566 Disease 2019 (COVID-19). *Clin Infect Dis.* 2022;74: 1678–1681.
- 567 58. Davies NG, Kucharski AJ, Eggo RM, Gimma A, Edmunds WJ, Jombart T, et al. Effects of non-  
568 pharmaceutical interventions on COVID-19 cases, deaths, and demand for hospital services in  
569 the UK: a modelling study. *Lancet Pub Health.* 2020;5: e375–e385.
- 570 59. Arons MM, Hatfield KM, Reddy SC, Kimball A, James A, Jacobs JR, et al. Presymptomatic  
571 SARS-CoV-2 infections and transmission in a skilled nursing facility. *N Engl J Med.* 2020;382:  
572 2081–2090.
- 573 60. Bullard J, Dust K, Funk D, Strong JE, Alexander D, Garnett L, et al. Predicting infectious  
574 Severe Acute Respiratory Syndrome Coronavirus 2 from diagnostic samples. *Clin Infect Dis.*  
575 2020;71: 2663–2666.
- 576 61. Wölfel R, Corman VM, Guggemos W, Seilmaier M, Zange S, Müller MA, et al. Virological  
577 assessment of hospitalized patients with COVID-2019. *Nature.* 2020;581: 465–469.
- 578
